# Supplementary material
Source: publisher figshare collection journal article supplement (https://acs.figshare.com/ndownloader/files/22810262)
Supplement: Supplementary file 1 [file 22810262]

**MXene/activated carbon hybrid capacitive deionization  
for permselective ion removal at low and high salinity**

Mohammad Torkamanzadeh,<sup>1,2</sup> Lei Wang,<sup>1,2</sup> Yuan Zhang,<sup>1,2</sup>

Öznil Budak,<sup>1,2</sup> Pattarachai Srimuk,<sup>1</sup> Volker Presser,<sup>1,2,\*</sup>

<sup>1</sup> *INM - Leibniz Institute for New Materials, D2 2, 66123, Saarbrücken, Germany*

<sup>2</sup> *Department of Materials Science & Engineering, Saarland University, Campus D2 2, 66123, Saarbrücken, Germany*

\* Corresponding author's email: [presser@presser-group.com](mailto:presser@presser-group.com)

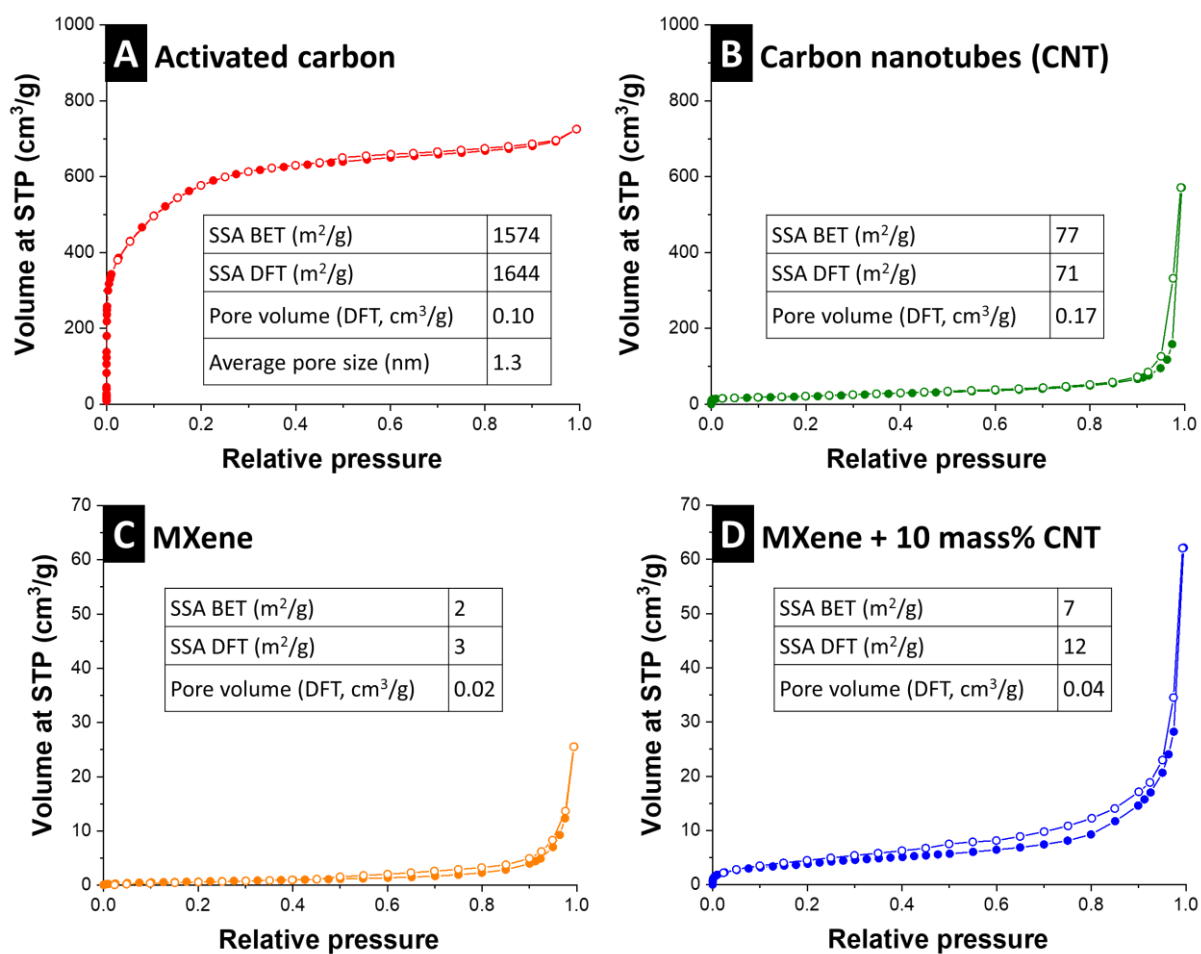

**Figure S1:** Nitrogen gas sorption isotherm of (A) activated carbon, (B) carbon nanotubes, (C) MXene powder, and (D) MXene/carbon nanotube electrodes recorded at a temperature of  $-196^\circ\text{C}$ . STP: standard temperature and pressure.

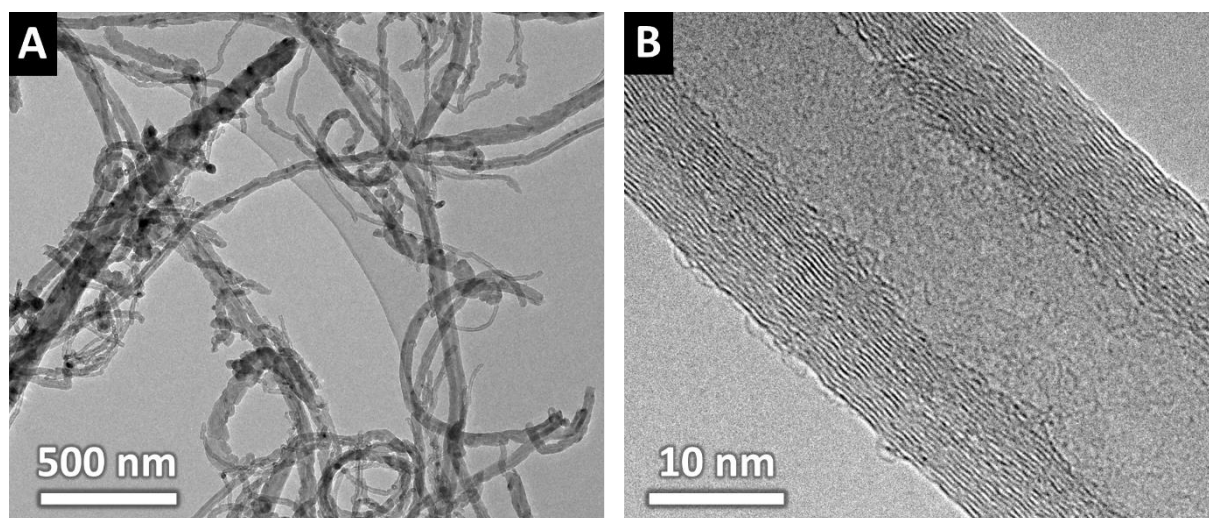

**Figure S2:** Transmission electron micrographs of the carbon nanotubes.

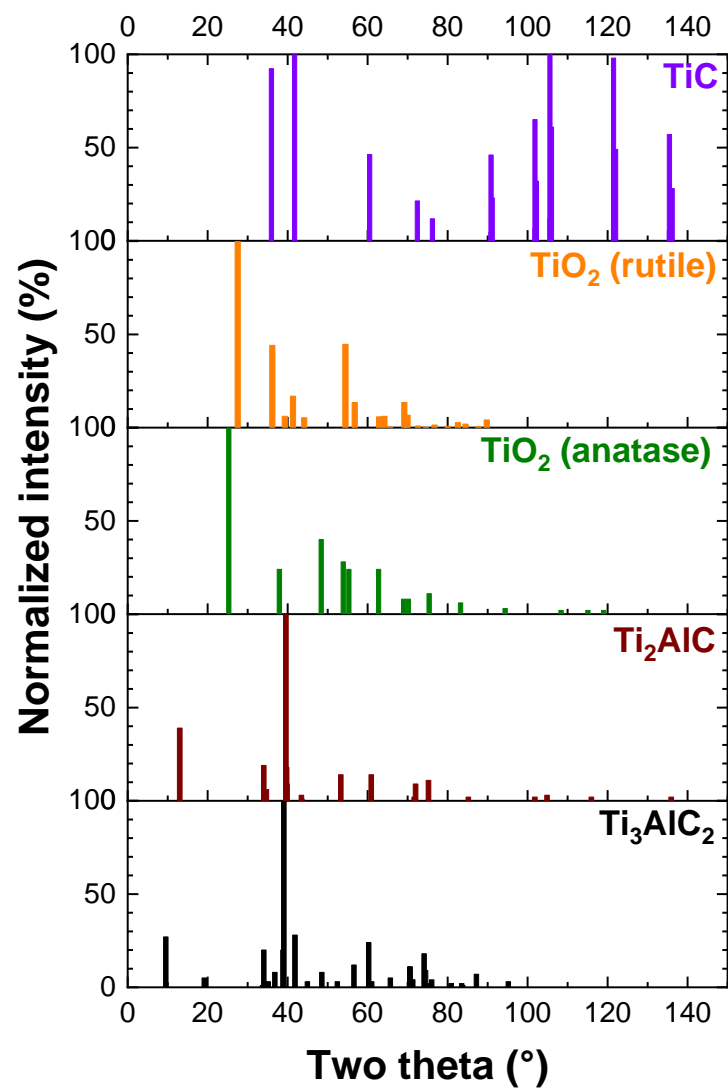

**Figure S3:** Relative intensities of the reference phases provided in Figure 2D.

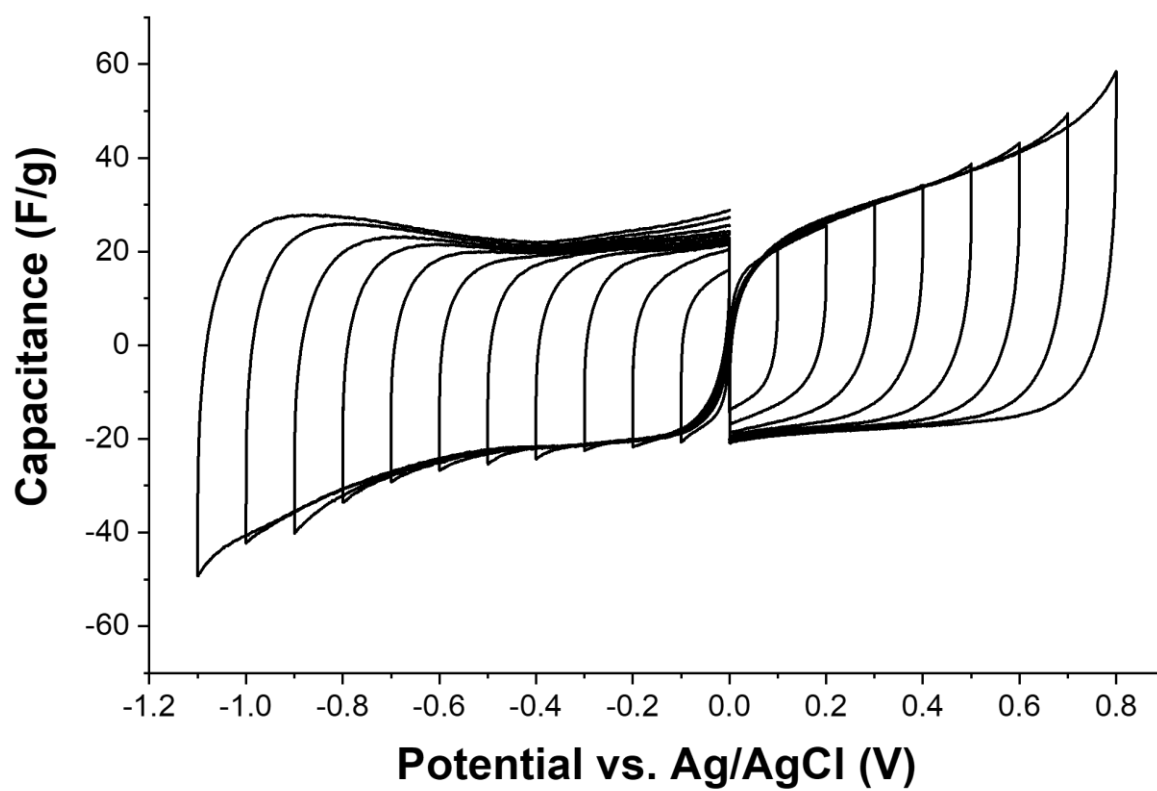

**Figure S4:** Half-cell window opening cyclic voltammograms of electrodes just composed of CNTs in aqueous 1 M NaCl electrolyte.

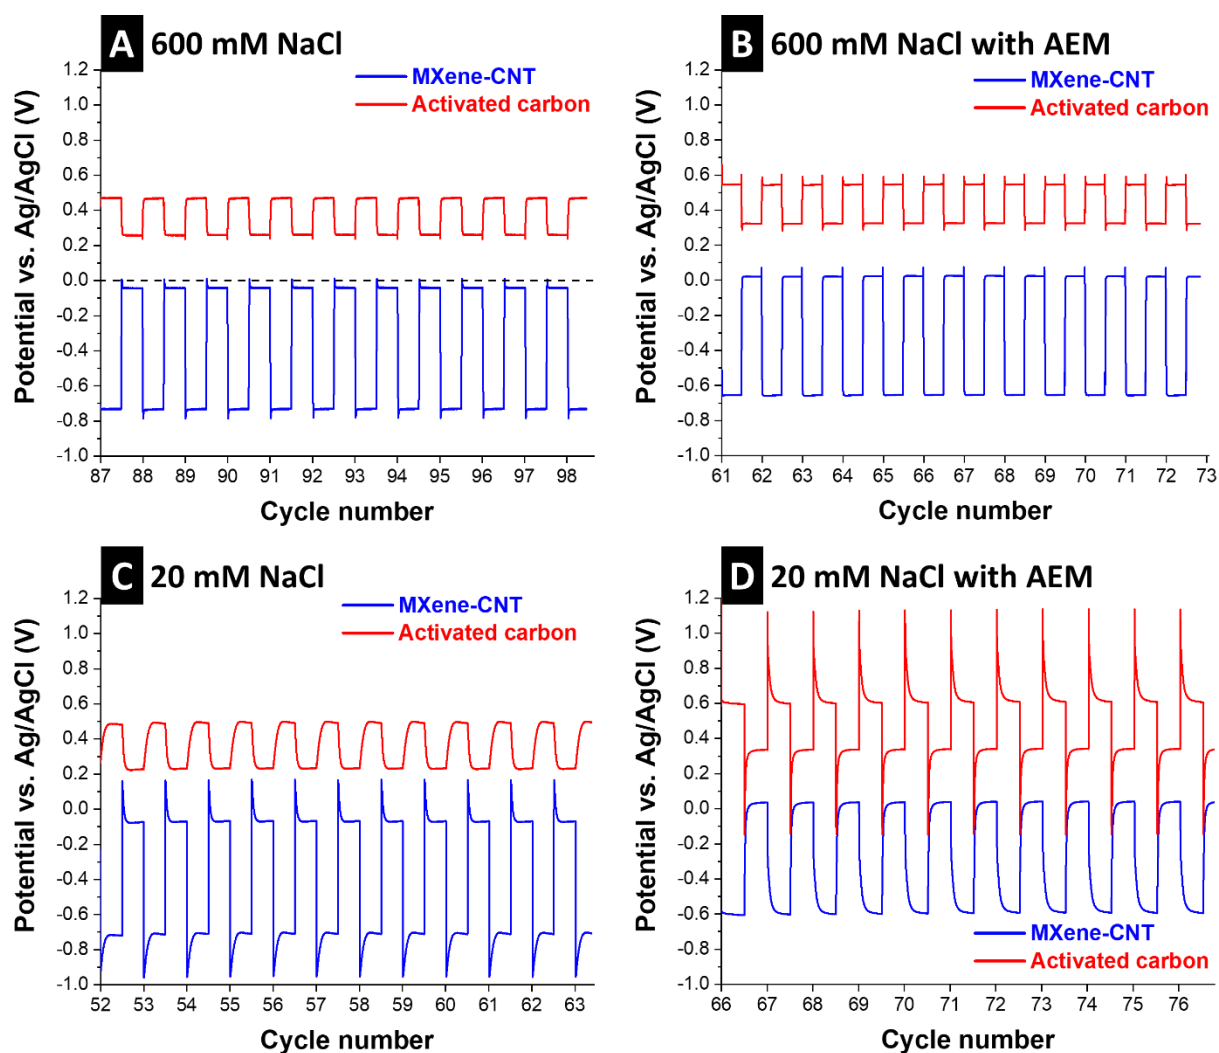

**Figure S5:** Potential development of individual electrodes upon charging the MXene/AC cell to a cell voltage of 1.2 V and discharging to a cell voltage of 0.3 V. (A-B) aqueous 600 mM NaCl; (C-D) aqueous 20 mM NaCl; (A,C) without an anion-exchange membrane (AEM) placed in front of the activated carbon electrode; (B,D) experiments with an AEM at the activated carbon electrode.

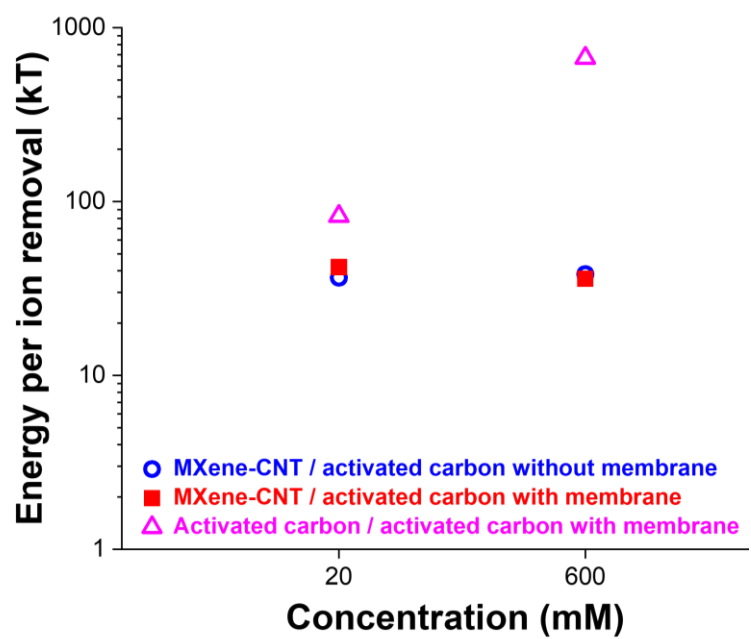

**Figure S6:** Energy consumption per ion removal.

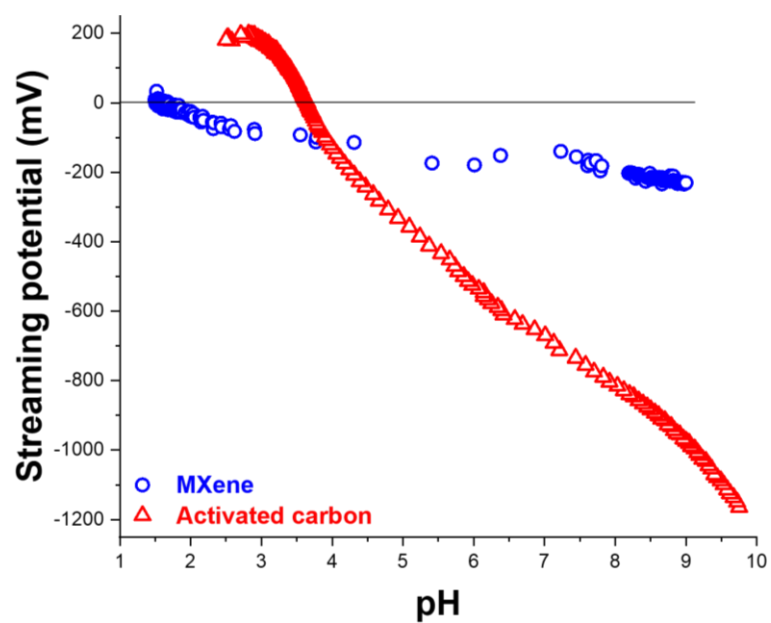

**Figure S7:** Streaming potential response of MXene and activated carbon in water.

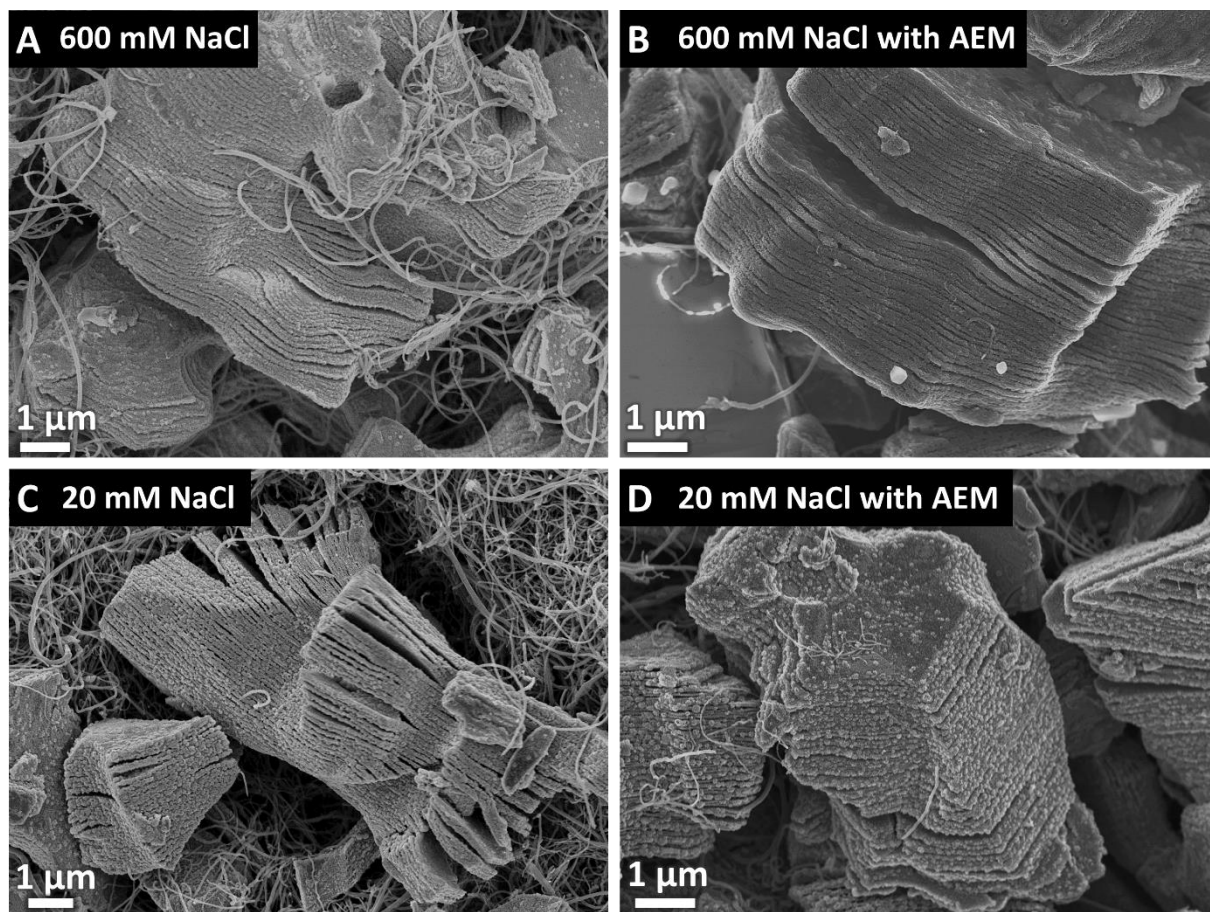

**Figure S8:** Post mortem scanning electron micrographs of MXene-CNT electrodes.

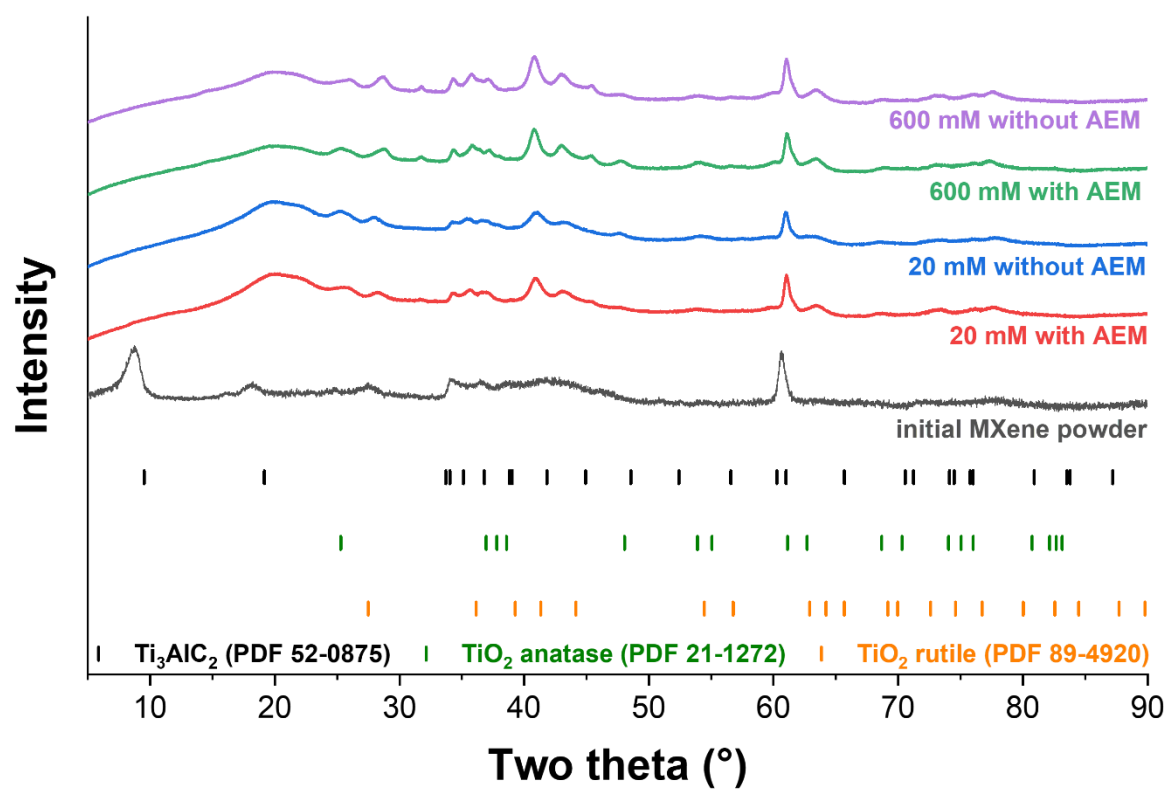

**Figure S9:** X-ray powder diffraction pattern of the initial MXene powder and after electrochemical operation for desalination (post mortem).
